# Supplementary material
Source: Springer Nature journal article supplement (https://www.springermedizin.de/resource/supplementary/12943_2014_1354_MOESM7_ESM.pdf/9552792)

A

Caki<sup>par</sup>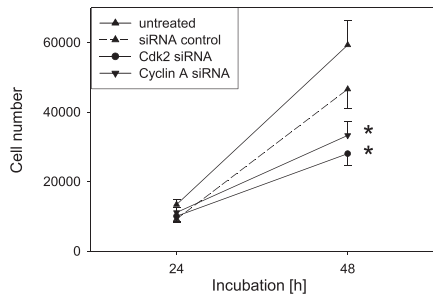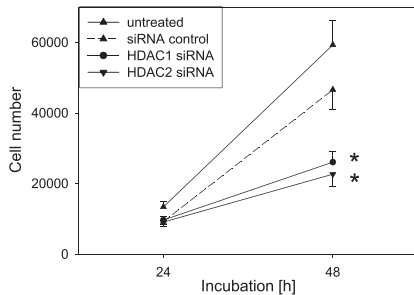

B

Caki<sup>res</sup>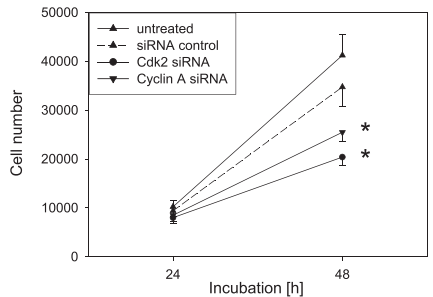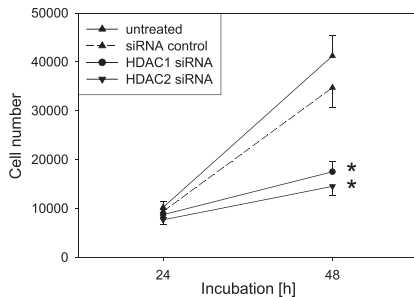

Supplement: MOESM7 [file 9552792]
